# Supplementary material for: Identification and Validation of a Prognostic Gene Signature for Diffuse Large B-Cell Lymphoma Based on Tumor Microenvironment-Related Genes
Source: Front Oncol. 2021 Feb 22;11:614211. doi: 10.3389/fonc.2021.614211 (PMC7938316; doi:10.3389/fonc.2021.614211)
Supplement: Supplementary Table 1 — ImmuneScores, StromalScores, and ESTIMATEScore. [file Table_1.xlsx]

## Sheet: Sheet1
Description	StromalScore	StromalScore	ImmuneScore	ImmuneScore	ESTIMATEScore	ESTIMATEScore
GSM775979	270.667	Low	2304.55	Low	2575.22	Low
GSM775980	609.17	High	2843.56	High	3452.73	High
GSM775981	870.085	High	2308.83	Low	3178.92	High
GSM775982	760.611	High	2665.49	High	3426.1	High
GSM775983	417.753	Low	2178.86	Low	2596.61	Low
GSM775984	850.733	High	1626.84	Low	2477.58	Low
GSM775985	538.755	Low	2017.44	Low	2556.19	Low
GSM775986	536.473	Low	2305.69	Low	2842.16	Low
GSM775987	265.293	Low	2314.5	Low	2579.79	Low
GSM775988	533.109	Low	2436.56	High	2969.67	Low
GSM775989	-61.0873	Low	882.317	Low	821.23	Low
GSM775990	447.321	Low	2745.03	High	3192.35	High
GSM775991	329.925	Low	2122.07	Low	2451.99	Low
GSM775992	9.03628	Low	1360.6	Low	1369.63	Low
GSM775993	902.976	High	1995.79	Low	2898.77	Low
GSM775994	561.704	Low	2659.4	High	3221.11	High
GSM775995	937.496	High	3286.18	High	4223.68	High
GSM775996	779.023	High	1921.8	Low	2700.83	Low
GSM775997	940.035	High	2627.24	High	3567.28	High
GSM775998	-13.5759	Low	2273.4	Low	2259.82	Low
GSM775999	1247.3	High	2559.09	High	3806.39	High
GSM776000	190.236	Low	1775.12	Low	1965.35	Low
GSM776002	950.837	High	2705.43	High	3656.27	High
GSM776003	202.646	Low	1362.93	Low	1565.57	Low
GSM776004	1107.19	High	1574.63	Low	2681.82	Low
GSM776005	523.257	Low	2746.9	High	3270.16	High
GSM776006	23.5076	Low	1682.73	Low	1706.23	Low
GSM776007	490.974	Low	2330.41	Low	2821.38	Low
GSM776009	718.789	High	968.117	Low	1686.91	Low
GSM776010	20.9444	Low	1839.77	Low	1860.72	Low
GSM776011	23.8735	Low	1896.93	Low	1920.8	Low
GSM776012	1116.35	High	2690.63	High	3806.98	High
GSM776013	-425.229	Low	2184.59	Low	1759.36	Low
GSM776014	866.313	High	2772.36	High	3638.67	High
GSM776015	668.707	High	1868.07	Low	2536.78	Low
GSM776016	1357.7	High	2518.28	High	3875.98	High
GSM776017	680.167	High	2054	Low	2734.17	Low
GSM776018	773.461	High	1950.9	Low	2724.36	Low
GSM776019	1339.24	High	2681.11	High	4020.35	High
GSM776020	1112.71	High	2332.22	Low	3444.93	High
GSM776021	807.911	High	2111.82	Low	2919.73	Low
GSM776022	867.091	High	2545.82	High	3412.91	High
GSM776023	957.924	High	2486.57	High	3444.49	High
GSM776024	-250.512	Low	1447.86	Low	1197.35	Low
GSM776025	569.148	Low	2931.58	High	3500.73	High
GSM776026	681.404	High	2676.02	High	3357.43	High
GSM776027	380.66	Low	2303.5	Low	2684.16	Low
GSM776028	1364.17	High	2961.77	High	4325.94	High
GSM776029	1827.21	High	1998.44	Low	3825.66	High
GSM776030	89.8766	Low	2259.16	Low	2349.04	Low
GSM776031	429.654	Low	2539.51	High	2969.17	Low
GSM776032	1253.92	High	3090.54	High	4344.46	High
GSM776033	12.8289	Low	2365.25	Low	2378.08	Low
GSM776034	1411.5	High	2516.99	High	3928.49	High
GSM776035	1084.8	High	2343.94	Low	3428.74	High
GSM776036	781.217	High	2746.16	High	3527.38	High
GSM776037	964.331	High	3095.42	High	4059.75	High
GSM776038	518.082	Low	2006.36	Low	2524.45	Low
GSM776040	858.438	High	2886.88	High	3745.32	High
GSM776041	75.3216	Low	2005.04	Low	2080.36	Low
GSM776042	564.614	Low	2821.38	High	3385.99	High
GSM776043	-222.15	Low	1672.22	Low	1450.07	Low
GSM776044	830.844	High	2674.89	High	3505.73	High
GSM776045	756.115	High	2176.28	Low	2932.39	Low
GSM776046	965.111	High	2443.88	High	3408.99	High
GSM776047	290.408	Low	2567.09	High	2857.5	Low
GSM776048	1260.82	High	2120.3	Low	3381.11	High
GSM776049	-34.1445	Low	2985.5	High	2951.36	Low
GSM776051	536.659	Low	2525	High	3061.66	High
GSM776052	898.344	High	2693.04	High	3591.38	High
GSM776053	-476.116	Low	1131.09	Low	654.971	Low
GSM776054	377.949	Low	3151.6	High	3529.55	High
GSM776055	287.475	Low	2108.56	Low	2396.04	Low
GSM776056	462.945	Low	2718.44	High	3181.38	High
GSM776057	768.667	High	2226.62	Low	2995.29	Low
GSM776058	363.418	Low	1275.25	Low	1638.67	Low
GSM776059	133.84	Low	1228.89	Low	1362.73	Low
GSM776060	192.555	Low	2233.47	Low	2426.03	Low
GSM776061	894.46	High	1805.48	Low	2699.94	Low
GSM776062	243.457	Low	1999.64	Low	2243.09	Low
GSM776063	698.12	High	1149.7	Low	1847.82	Low
GSM776064	420.435	Low	1875.1	Low	2295.54	Low
GSM776065	423.511	Low	2344.48	Low	2767.99	Low
GSM776066	647.772	High	2303.34	Low	2951.11	Low
GSM776067	727.793	High	2011.2	Low	2738.99	Low
GSM776068	644.619	High	591.954	Low	1236.57	Low
GSM776069	127.629	Low	1805.46	Low	1933.09	Low
GSM776070	1193.59	High	2976.83	High	4170.42	High
GSM776071	256.814	Low	1715.33	Low	1972.15	Low
GSM776072	827.636	High	2235.15	Low	3062.78	High
GSM776073	1651.03	High	2796.87	High	4447.9	High
GSM776074	828.732	High	2585.34	High	3414.07	High
GSM776076	476.983	Low	2586.71	High	3063.69	High
GSM776077	974.525	High	898.739	Low	1873.26	Low
GSM776078	661.286	High	2392.08	High	3053.36	High
GSM776080	420.721	Low	2553.09	High	2973.82	Low
GSM776081	860.243	High	2570.62	High	3430.86	High
GSM776082	1255.62	High	2749.34	High	4004.96	High
GSM776083	583.051	Low	1336.34	Low	1919.39	Low
GSM776084	128.652	Low	2014.36	Low	2143.02	Low
GSM776085	1254.18	High	2561.85	High	3816.03	High
GSM776086	1057.65	High	2614.45	High	3672.1	High
GSM776087	278.841	Low	1780.78	Low	2059.62	Low
GSM776088	681.864	High	2385.31	High	3067.18	High
GSM776089	408.599	Low	3033.15	High	3441.75	High
GSM776090	163.165	Low	2774.27	High	2937.43	Low
GSM776091	-159.386	Low	1320.39	Low	1161.01	Low
GSM776093	838.234	High	2208.48	Low	3046.72	High
GSM776094	-138.146	Low	2445.28	High	2307.13	Low
GSM776095	1732.01	High	2793.75	High	4525.76	High
GSM776096	596.938	Low	2270	Low	2866.93	Low
GSM776097	529.882	Low	2201.81	Low	2731.69	Low
GSM776098	445.055	Low	2353.66	Low	2798.72	Low
GSM776099	270.14	Low	2236.5	Low	2506.64	Low
GSM776100	552.854	Low	2891.44	High	3444.29	High
GSM776101	266.698	Low	2217.48	Low	2484.18	Low
GSM776102	876.551	High	1748.67	Low	2625.22	Low
GSM776103	604.863	High	2427.16	High	3032.03	High
GSM776104	278.675	Low	2586.51	High	2865.19	Low
GSM776105	1436.87	High	2453.21	High	3890.08	High
GSM776106	860.282	High	2801.91	High	3662.19	High
GSM776107	995.213	High	2679.07	High	3674.29	High
GSM776108	389.271	Low	2541.95	High	2931.22	Low
GSM776109	592.446	Low	2609.24	High	3201.69	High
GSM776110	455.635	Low	2895.21	High	3350.84	High
GSM776111	1494.34	High	2625.66	High	4120	High
GSM776113	853.156	High	2214.53	Low	3067.69	High
GSM776114	825.315	High	2405.24	High	3230.55	High
GSM776115	1287.03	High	2370.44	Low	3657.47	High
GSM776116	796.911	High	2086.56	Low	2883.47	Low
GSM776117	599.922	Low	2535.04	High	3134.96	High
GSM776118	277.664	Low	2248.8	Low	2526.47	Low
GSM776119	573.859	Low	2913.09	High	3486.94	High
GSM776120	1157.85	High	2482.53	High	3640.38	High
GSM776121	-45.77	Low	2444.01	High	2398.24	Low
GSM776122	173.838	Low	2514.07	High	2687.91	Low
GSM776123	337.8	Low	2546.41	High	2884.21	Low
GSM776124	353.731	Low	2179.02	Low	2532.75	Low
GSM776125	853.436	High	2392.31	High	3245.75	High
GSM776126	592.254	Low	2651.96	High	3244.21	High
GSM776127	506.949	Low	2206.13	Low	2713.08	Low
GSM776128	-470.991	Low	1620.93	Low	1149.94	Low
GSM776129	769.913	High	2607.38	High	3377.29	High
GSM776131	863.407	High	2035.67	Low	2899.08	Low
GSM776132	944.325	High	2750.71	High	3695.03	High
GSM776133	1082.63	High	2350.68	Low	3433.31	High
GSM776134	814.928	High	2922.14	High	3737.07	High
GSM776135	375.206	Low	2305.66	Low	2680.87	Low
GSM776136	573.678	Low	1553.07	Low	2126.74	Low
GSM776137	634.692	High	2175.02	Low	2809.72	Low
GSM776138	312.969	Low	2296.74	Low	2609.71	Low
GSM776139	171.241	Low	2193.79	Low	2365.03	Low
GSM776140	639.622	High	2090.11	Low	2729.73	Low
GSM776141	165.161	Low	1680.71	Low	1845.87	Low
GSM776142	1115.08	High	2824.28	High	3939.36	High
GSM776143	-272.37	Low	2278.18	Low	2005.8	Low
GSM776144	865.042	High	2303.83	Low	3168.87	High
GSM776145	1137.84	High	2356.08	Low	3493.93	High
GSM776146	865.598	High	2657.11	High	3522.71	High
GSM776147	295.361	Low	2002.62	Low	2297.99	Low
GSM776148	596.827	Low	2150.81	Low	2747.64	Low
GSM776149	599.83	Low	1940.31	Low	2540.14	Low
GSM776151	666.895	High	2034.93	Low	2701.83	Low
GSM776152	741.991	High	2558.12	High	3300.11	High
GSM776153	384.235	Low	2057.23	Low	2441.47	Low
GSM776154	1020.72	High	2179.27	Low	3199.99	High
GSM776155	621.325	High	1983.25	Low	2604.57	Low
GSM776156	461.921	Low	2470.68	High	2932.6	Low
GSM776157	447.785	Low	2520.55	High	2968.33	Low
GSM776158	66.7148	Low	2198.27	Low	2264.98	Low
GSM776160	75.339	Low	2204	Low	2279.34	Low
GSM776161	-553.923	Low	1303.2	Low	749.277	Low
GSM776162	543.652	Low	2697.42	High	3241.07	High
GSM776163	1502.24	High	2351.16	Low	3853.39	High
GSM776164	83.1294	Low	2530.07	High	2613.2	Low
GSM776165	307.49	Low	2357.08	Low	2664.57	Low
GSM776166	951.457	High	2262.86	Low	3214.32	High
GSM776167	695.041	High	2483.55	High	3178.59	High
GSM776168	562.163	Low	3150.48	High	3712.65	High
GSM776169	699.499	High	1760.73	Low	2460.23	Low
GSM776170	253.549	Low	937.722	Low	1191.27	Low
GSM776171	919.182	High	2235.14	Low	3154.32	High
GSM776172	-125.328	Low	2345.85	Low	2220.52	Low
GSM776173	372.832	Low	2851.38	High	3224.21	High
GSM776174	204.883	Low	2911.04	High	3115.93	High
GSM776175	65.6568	Low	966.116	Low	1031.77	Low
GSM776176	1325.42	High	2573.41	High	3898.83	High
GSM776177	1211.08	High	2818.62	High	4029.69	High
GSM776178	480.437	Low	2450.17	High	2930.61	Low
GSM776179	468.341	Low	2273.32	Low	2741.67	Low
GSM776180	652.235	High	2177.31	Low	2829.54	Low
GSM776181	938.818	High	1909.37	Low	2848.19	Low
GSM776182	907.456	High	2465.02	High	3372.47	High
GSM776183	466.917	Low	2132.78	Low	2599.69	Low
GSM776184	1111.18	High	2430.81	High	3542	High
GSM776185	259.927	Low	2066.08	Low	2326.01	Low
GSM776186	78.9451	Low	2178.22	Low	2257.17	Low
GSM776187	289.163	Low	2916.19	High	3205.35	High
GSM776188	203.542	Low	1072.84	Low	1276.38	Low
GSM776189	171.987	Low	1483.6	Low	1655.59	Low
GSM776190	380.922	Low	2131.5	Low	2512.42	Low
GSM776191	327.799	Low	2098.14	Low	2425.94	Low
GSM776192	318.342	Low	2050.35	Low	2368.69	Low
GSM776193	201.213	Low	2308.9	Low	2510.12	Low
GSM776194	355.33	Low	2414.78	High	2770.11	Low
GSM776195	147.318	Low	1461.66	Low	1608.98	Low
GSM776196	234.127	Low	2442.4	High	2676.53	Low
GSM776197	524.46	Low	2269.57	Low	2794.03	Low
GSM776198	283.401	Low	2602.9	High	2886.31	Low
GSM776199	711.737	High	2612.37	High	3324.11	High
GSM776200	677.15	High	2725.59	High	3402.73	High
GSM776201	16.4229	Low	2254.82	Low	2271.25	Low
GSM776202	415.829	Low	2640.08	High	3055.91	High
GSM776203	699.704	High	1567.76	Low	2267.46	Low
GSM776204	58.6184	Low	2106.34	Low	2164.96	Low
GSM776205	181.789	Low	2205.54	Low	2387.33	Low
GSM776206	541.851	Low	2457.5	High	2999.35	Low
GSM776207	115.419	Low	2240.49	Low	2355.91	Low
GSM776208	33.4622	Low	2578.29	High	2611.75	Low
GSM776209	-422.679	Low	1436.53	Low	1013.85	Low
GSM776210	696.091	High	2629.44	High	3325.53	High
GSM776211	481.32	Low	2691.92	High	3173.24	High
GSM776213	1423.09	High	2600.32	High	4023.41	High
GSM776214	387.555	Low	2111.32	Low	2498.87	Low
GSM776215	955.689	High	2761.46	High	3717.14	High
GSM776216	569.001	Low	1780.95	Low	2349.95	Low
GSM776217	314.272	Low	2143.94	Low	2458.21	Low
GSM776218	-13.4483	Low	2305.24	Low	2291.8	Low
GSM776219	944.918	High	2902.19	High	3847.11	High
GSM776220	664.903	High	2415.89	High	3080.79	High
GSM776221	38.9947	Low	2602.53	High	2641.52	Low
GSM776222	64.6037	Low	2269.11	Low	2333.72	Low
GSM776223	210.277	Low	1985.13	Low	2195.41	Low
GSM776224	1503.35	High	2331.15	Low	3834.5	High
GSM776225	1082.04	High	2444.72	High	3526.76	High
GSM776226	1034.48	High	2057.25	Low	3091.73	High
GSM776227	1452.02	High	2640.16	High	4092.18	High
GSM776228	874.186	High	2435.15	High	3309.33	High
GSM776229	1426.75	High	2220.97	Low	3647.72	High
GSM776230	769.924	High	2103.58	Low	2873.51	Low
GSM776231	495.417	Low	2426.38	High	2921.8	Low
GSM776232	610.917	High	2464.72	High	3075.64	High
GSM776233	746.018	High	2635.46	High	3381.48	High
GSM776234	218.682	Low	2357.49	Low	2576.17	Low
GSM776235	1540.08	High	2620.06	High	4160.14	High
GSM776236	889.232	High	2716.19	High	3605.42	High
GSM776237	426.813	Low	2246.53	Low	2673.34	Low
GSM776238	559.462	Low	2031.6	Low	2591.06	Low
GSM776239	1626.13	High	2724.05	High	4350.18	High
GSM776240	930.311	High	2396.3	High	3326.61	High
GSM776241	523.942	Low	2708.53	High	3232.47	High
GSM776242	128.506	Low	1634.17	Low	1762.68	Low
GSM776243	804.267	High	1923.14	Low	2727.4	Low
GSM776244	757.171	High	2648.28	High	3405.45	High
GSM776245	789.28	High	2981.23	High	3770.51	High
GSM776246	769.025	High	2555.55	High	3324.58	High
GSM776247	727.27	High	2290.99	Low	3018.26	Low
GSM776249	47.3297	Low	1807.54	Low	1854.87	Low
GSM776250	492.04	Low	2504.31	High	2996.35	Low
GSM776251	286.472	Low	1812.24	Low	2098.72	Low
GSM776252	525.448	Low	2593.01	High	3118.46	High
GSM776253	464.327	Low	1897.83	Low	2362.16	Low
GSM776254	1005.21	High	2002.75	Low	3007.96	Low
GSM776255	1033.41	High	1987.75	Low	3021.16	Low
GSM776256	154.893	Low	2536.29	High	2691.18	Low
GSM776257	490.619	Low	1873.24	Low	2363.86	Low
GSM776258	1248.22	High	2436.23	High	3684.45	High
GSM776259	302.72	Low	2480.69	High	2783.41	Low
GSM776260	523.989	Low	2314.41	Low	2838.4	Low
GSM776261	1271.99	High	3290.09	High	4562.08	High
GSM776263	808.271	High	2303.13	Low	3111.4	High
GSM776264	460.176	Low	2589.86	High	3050.03	High
GSM776265	327.254	Low	3050.56	High	3377.81	High
GSM776266	26.5927	Low	2022.35	Low	2048.94	Low
GSM776267	-279.777	Low	2453.27	High	2173.49	Low
GSM776268	1131.22	High	3174.35	High	4305.57	High
GSM776269	596.92	Low	2938.7	High	3535.62	High
GSM776270	1229.88	High	2324.65	Low	3554.53	High
GSM776271	1144.08	High	2663.02	High	3807.11	High
GSM776272	310.81	Low	2314.92	Low	2625.73	Low
GSM776273	1142.39	High	2251.26	Low	3393.65	High
GSM776276	833.101	High	2105.8	Low	2938.91	Low
GSM776277	1014.82	High	2513.41	High	3528.24	High
GSM776279	449.044	Low	734.867	Low	1183.91	Low
GSM776280	504.266	Low	2347.95	Low	2852.22	Low
GSM776281	588.045	Low	2907.5	High	3495.55	High
GSM776282	310.358	Low	2133.07	Low	2443.43	Low
GSM776283	-245.23	Low	2074.67	Low	1829.44	Low
GSM776284	318.671	Low	1988.72	Low	2307.39	Low
GSM776285	379.797	Low	2274.2	Low	2654	Low
GSM776286	564.648	Low	2569.27	High	3133.91	High
GSM776287	349.655	Low	1292.17	Low	1641.83	Low
GSM776288	855.799	High	2742.31	High	3598.11	High
GSM776289	1392.42	High	2756.95	High	4149.37	High
GSM776290	296.579	Low	2156.5	Low	2453.08	Low
GSM776291	653.144	High	2227.49	Low	2880.64	Low
GSM776292	780.598	High	2416.05	High	3196.65	High
GSM776293	1029.52	High	2650.63	High	3680.15	High
GSM776294	456.448	Low	2383.51	Low	2839.96	Low
GSM776295	303.859	Low	2499.07	High	2802.93	Low
GSM776296	532.316	Low	2033.48	Low	2565.79	Low
GSM776297	345.478	Low	1548.47	Low	1893.95	Low
GSM776298	481.392	Low	2429.47	High	2910.86	Low
GSM776299	918.111	High	2283.42	Low	3201.53	High
GSM776300	343.528	Low	2796.24	High	3139.77	High
GSM776301	841.332	High	2948.14	High	3789.47	High
GSM776302	853.593	High	2588.85	High	3442.44	High
GSM776303	1248.51	High	2400.75	High	3649.26	High
GSM776304	95.4227	Low	2354.35	Low	2449.77	Low
GSM776305	938.097	High	2467.18	High	3405.28	High
GSM776306	573.06	Low	2364.97	Low	2938.03	Low
GSM776307	592.105	Low	2396.1	High	2988.21	Low
GSM776308	428.916	Low	2647.86	High	3076.78	High
GSM776309	831.719	High	2925.35	High	3757.07	High
GSM776310	951.865	High	2387.95	High	3339.82	High
GSM776311	479.09	Low	2172.5	Low	2651.59	Low
GSM776312	866.445	High	2419.34	High	3285.79	High
GSM776313	260.64	Low	2037.83	Low	2298.47	Low
GSM776314	518.609	Low	2703.75	High	3222.36	High
GSM776315	777.025	High	2210.75	Low	2987.78	Low
GSM776316	966.543	High	2303.77	Low	3270.31	High
GSM776317	-109.239	Low	2191.73	Low	2082.5	Low
GSM776318	854.306	High	2705.64	High	3559.94	High
GSM776319	581.459	Low	1942.66	Low	2524.12	Low
GSM776320	357.147	Low	745.82	Low	1102.97	Low
GSM776322	926.218	High	2758.82	High	3685.04	High
GSM776324	260.597	Low	2881.96	High	3142.56	High
GSM776325	759.968	High	2211.2	Low	2971.17	Low
GSM776327	970.524	High	2476.45	High	3446.97	High
GSM776328	1112.23	High	2717.87	High	3830.11	High
GSM776329	1043.83	High	2604.89	High	3648.72	High
GSM776331	1969.33	High	2523.8	High	4493.13	High
GSM776332	411.69	Low	3093.78	High	3505.47	High
GSM776333	1928.57	High	2038.19	Low	3966.77	High
GSM776334	1140.59	High	3223.44	High	4364.03	High
GSM776335	526.417	Low	2846.07	High	3372.49	High
GSM776336	921.297	High	2307.27	Low	3228.56	High
GSM776338	1124.54	High	2953.17	High	4077.71	High
GSM776339	521.247	Low	1930.76	Low	2452.01	Low
GSM776340	431.541	Low	2746.24	High	3177.78	High
GSM776341	1203.47	High	2679.5	High	3882.97	High
GSM776342	1150.48	High	2793.28	High	3943.76	High
GSM776343	-348.766	Low	1670.42	Low	1321.65	Low
GSM776344	1169.48	High	2704.93	High	3874.41	High
GSM776345	1232.35	High	2589.81	High	3822.16	High
GSM776346	1369.06	High	2572.34	High	3941.4	High
GSM776347	1183.17	High	2496.12	High	3679.29	High
GSM776348	291.449	Low	1187.39	Low	1478.84	Low
GSM776349	1262.89	High	3092.74	High	4355.63	High
GSM776350	1437.86	High	3159.38	High	4597.24	High
GSM776351	490.906	Low	2791.74	High	3282.65	High
GSM776352	150.713	Low	2025.43	Low	2176.15	Low
GSM776353	1104.67	High	2880.92	High	3985.59	High
GSM776354	619.175	High	2761.34	High	3380.52	High
GSM776355	-207.564	Low	2170.67	Low	1963.11	Low
GSM776356	458.702	Low	2564.32	High	3023.02	Low
GSM776357	140.39	Low	2115.53	Low	2255.92	Low
GSM776358	1573.57	High	1794.27	Low	3367.84	High
GSM776360	375.622	Low	1825.42	Low	2201.04	Low
GSM776361	1074.48	High	2765.61	High	3840.09	High
GSM776362	691.275	High	2239.24	Low	2930.51	Low
GSM776363	306.642	Low	1602.48	Low	1909.13	Low
GSM776364	337.106	Low	1661.77	Low	1998.87	Low
GSM776365	768.314	High	2041.1	Low	2809.41	Low
GSM776366	1354.3	High	2614.03	High	3968.34	High
GSM776367	711.719	High	2668.41	High	3380.12	High
GSM776368	670.563	High	1870.15	Low	2540.71	Low
GSM776369	567.543	Low	1952.13	Low	2519.67	Low
GSM776370	608.262	High	2605.7	High	3213.96	High
GSM776371	117.397	Low	1535.46	Low	1652.86	Low
GSM776372	161.781	Low	928.795	Low	1090.58	Low
GSM776373	-222.817	Low	2261.11	Low	2038.29	Low
GSM776374	1050.73	High	2847.55	High	3898.28	High
GSM776375	972.605	High	2830.48	High	3803.08	High
GSM776376	0.0820326	Low	2133.19	Low	2133.27	Low
GSM776377	792.137	High	2725.1	High	3517.24	High
GSM776378	1407.67	High	3048.78	High	4456.45	High
GSM776379	-35.3777	Low	2428.16	High	2392.78	Low
GSM776380	1327.2	High	3001.82	High	4329.01	High
GSM776381	644.566	High	2529.33	High	3173.9	High
GSM776382	528.826	Low	3078.94	High	3607.76	High
GSM776383	923.705	High	2826.17	High	3749.88	High
GSM776384	772.059	High	2682.62	High	3454.68	High
GSM776386	513.156	Low	3112.37	High	3625.52	High
GSM776387	565.926	Low	2421.25	High	2987.17	Low
GSM776388	888.275	High	3120.95	High	4009.23	High
GSM776389	722.22	High	2301.67	Low	3023.89	High
GSM776390	1155.52	High	3015.4	High	4170.92	High
GSM776391	585.093	Low	2772.39	High	3357.48	High
GSM776392	-206.335	Low	2563.73	High	2357.4	Low
GSM776393	891.824	High	2086.21	Low	2978.03	Low
GSM776394	1307.48	High	2673.99	High	3981.47	High
GSM776395	545.995	Low	2727.42	High	3273.42	High
GSM776396	297.558	Low	2253.57	Low	2551.13	Low
GSM776397	679.702	High	2460.56	High	3140.26	High
GSM776398	1107.88	High	3343.35	High	4451.22	High
GSM776399	13.2258	Low	2707.49	High	2720.71	Low
GSM776400	1478.6	High	2291.8	Low	3770.4	High
GSM776401	515.179	Low	2266.09	Low	2781.27	Low
GSM776403	849.352	High	2903.9	High	3753.25	High
GSM776404	731.949	High	2330.99	Low	3062.94	High
GSM776405	593.431	Low	2632.58	High	3226.01	High
GSM776406	992.395	High	2535.77	High	3528.17	High
GSM776407	332.432	Low	2957.88	High	3290.31	High
GSM776408	1288.89	High	2641.88	High	3930.77	High
GSM776409	230.229	Low	1636.1	Low	1866.33	Low
GSM776410	899.605	High	2609.8	High	3509.41	High
GSM776411	-147.726	Low	1983.12	Low	1835.39	Low
GSM776412	684.546	High	2839.98	High	3524.53	High
GSM776413	278.905	Low	2821.42	High	3100.32	High
GSM776414	-73.865	Low	2115.44	Low	2041.57	Low
GSM776415	954.832	High	2069.81	Low	3024.64	High
GSM776416	132.146	Low	2279.13	Low	2411.27	Low
GSM776417	447.19	Low	2578.25	High	3025.44	High
GSM776418	221.673	Low	2816.19	High	3037.87	High
GSM776419	347.991	Low	1979.42	Low	2327.41	Low
GSM776420	783.548	High	2883.86	High	3667.41	High
GSM776421	1016.89	High	2469.32	High	3486.21	High
GSM776423	1495.72	High	2585.15	High	4080.87	High
GSM776424	999.991	High	2260.33	Low	3260.32	High
GSM776425	1299.2	High	2161.85	Low	3461.04	High
GSM776426	441.247	Low	637.534	Low	1078.78	Low
GSM776427	583.308	Low	2191.03	Low	2774.34	Low
GSM776428	979.627	High	2566.03	High	3545.66	High
GSM776429	762.871	High	2279.11	Low	3041.98	High
GSM776430	928.234	High	2396.91	High	3325.15	High
GSM776431	278.613	Low	2030.49	Low	2309.1	Low
GSM776432	216.682	Low	2335.04	Low	2551.72	Low
GSM776434	1278.48	High	2288.37	Low	3566.85	High
GSM776435	440.843	Low	2512.11	High	2952.95	Low
GSM776436	747.449	High	2110.01	Low	2857.46	Low
GSM776437	771.777	High	2343.49	Low	3115.27	High
GSM776438	777.75	High	2943.62	High	3721.37	High
GSM776440	485.081	Low	2238.22	Low	2723.3	Low
GSM776441	775.384	High	3063.6	High	3838.98	High
GSM776442	655.976	High	1833.3	Low	2489.28	Low
GSM776443	866.602	High	2466.36	High	3332.97	High
GSM776444	835.079	High	2830.96	High	3666.04	High
GSM776445	741.85	High	2439.1	High	3180.95	High
GSM776446	906.963	High	2668.84	High	3575.8	High
GSM776447	828.737	High	2437.5	High	3266.23	High
GSM776448	605.834	High	2629.48	High	3235.31	High
GSM776449	1231.61	High	2765.97	High	3997.58	High
GSM776450	362.877	Low	2577.42	High	2940.3	Low
GSM776451	688.436	High	2924.81	High	3613.25	High
GSM776452	624.423	High	2177.93	Low	2802.36	Low
GSM776453	1049.48	High	2252.6	Low	3302.08	High
GSM776454	292.846	Low	2204.08	Low	2496.92	Low
GSM776455	465.183	Low	2435.24	High	2900.42	Low
GSM776456	1251.46	High	2676.77	High	3928.24	High
GSM776457	1301.44	High	3097.68	High	4399.11	High
GSM776458	959.014	High	2324.84	Low	3283.86	High
GSM776459	485.409	Low	2552.69	High	3038.1	High
GSM776460	-418.376	Low	898.365	Low	479.99	Low
GSM776461	677.479	High	1804.63	Low	2482.11	Low
GSM776462	652.725	High	1448.14	Low	2100.87	Low
GSM776463	-413.374	Low	2104.4	Low	1691.03	Low
GSM776464	609.821	High	2379.66	Low	2989.48	Low
GSM776465	834.72	High	2374.46	Low	3209.18	High
GSM776466	627.145	High	2281.1	Low	2908.24	Low
GSM776467	1063.81	High	2732.3	High	3796.11	High
GSM776468	374.63	Low	2438.54	High	2813.17	Low
GSM776469	837.943	High	2075.27	Low	2913.22	Low
GSM776470	1455.98	High	2432.93	High	3888.91	High
GSM776471	416.661	Low	2276.77	Low	2693.43	Low
GSM776472	924.326	High	2700.55	High	3624.88	High
GSM776473	81.7152	Low	1996.97	Low	2078.69	Low
GSM776474	301.718	Low	2257.4	Low	2559.12	Low
GSM776475	599.463	Low	2649.99	High	3249.46	High
GSM776476	643.756	High	2395.3	High	3039.06	High
