# Supplementary material for: Identification and Validation of a Prognostic Gene Signature for Diffuse Large B-Cell Lymphoma Based on Tumor Microenvironment-Related Genes
Source: Front Oncol. 2021 Feb 22;11:614211. doi: 10.3389/fonc.2021.614211 (PMC7938316; doi:10.3389/fonc.2021.614211)
Supplement: Supplementary Table 2 — The list of 183 DEGs. [file Table_2.xlsx]

## Sheet: Sheet1
UP-181	DOWN-2
KCNMA1	NOL4
FGL2	ZNF385C
ANXA1
GUCY1A3
MITF
RTN1
C15orf48
CXCL13
CSF3R
FAM129A
CMPK2
ACVRL1
GPR137B
HNMT
MEIS3P1
LAIR1
DUSP4
GIMAP1
ALDH2
C3
RIN2
ABCA1
LAMP3
GAS2L1
TNFSF10
SERPING1
PARVA
C8orf4
CHST11
FYB
DPYD
NRIP1
QKI
NUPR1
SERPINA1
ANTXR2
ITPRIPL2
ADAMTS2
FCGR1B
CRY1
RBPMS
MS4A6A
PRRX1
MT1G
TFEC
RASSF4
LEPROT
CEBPD
CTSB
MYOF
STOM
GSN
LPCAT2
DSE
TNFRSF1A
SLAMF8
IL13RA1
SPIDR
GLIPR2
SPRED1
CPM
CTSK
NOTCH2
ABI3BP
SMCO4
LST1
VSIG4
MXRA5
ADGRE2
EPSTI1
ITGB2
EPB41L3
CTSD
C10orf10
DOCK4
NFIC
MT1X
SOCS3
TIMP1
S100A8
KLF9
RAB31
MRC1
AIF1
CCL2
S100A11
PLXND1
FPR1
ITGAM
PTTG1IP
CD163
PAM
FOSL2
C1S
SLC8A1-AS1
FCGR2A
CECR1
TYROBP
LATS2
IFITM3
DAB2
AXL
ARHGAP18
CCR1
MT1E
HS3ST3B1
FAM198B
LGMN
LAMB1
FNIP2
DKK3
PLXDC2
DMXL2
GIMAP7
SNX9
LGALS3
CLEC7A
CCL8
TNFSF13B
GNAQ
GBP1
CXCL12
FCGR2C
GLUL
PLSCR1
MICAL2
RBM47
ALDH1A1
ACSL1
SCARB2
FCGR3B
C1QB
ARSD
ITGAX
MT1HL1
MGAT4A
RUNX2
MAFB
TFPI
IL7R
MS4A7
LCP2
SLC39A8
SLC1A3
CCL5
DDX60L
GAS7
LAMP2
PTPRM
TCF7L2
ATXN1
SPSB1
PRKCH
MAF
CCR5
GPX3
SHTN1
RNF130
TIMP2
MT1H
FCER1G
KCTD12
EPAS1
TLR2
LPAR1
CEBPB
FMNL2
ANXA4
CSF1R
NPL
FBXO32
TGFBI
HAVCR2
AAK1
FCHO2
APOC1
C1orf162
CYP1B1
PNKD
MCTP1
KLF3
